# Supplementary material
Source: PubMed Central journal article supplement (PMC3140183)
Supplement: supp_btp658_bioinf-2009-0837-File001.pdf [file supp_btp658_bioinf-2009-0837-File001.pdf]

---

# High-throughput extraction and comparison of gene expression patterns from 2D RNA in situ hybridization images (Supplemental)

Daniel L. Mace<sup>1,2</sup>, Nicole Varnado<sup>2</sup>, Weiping Zhang<sup>2</sup>, Erwin Frise<sup>3</sup>, and Uwe Ohler<sup>2\*</sup>

<sup>1</sup>Computational Biology and Bioinformatics Graduate Program, Duke University, Durham, NC 27702

<sup>2</sup>Institute for Genome Sciences and Policy, Duke University, Durham, NC 27702

<sup>3</sup>Department of Genome and Computational Biology, Lawrence Berkeley National Laboratory, Berkeley, CA 94720

Received on XXXXX; revised on XXXXX; accepted on XXXXX

Associate Editor: XXXXXXXX

---

## 1 SCORING METRIC COMPARISON

Below we include the comparison of the scoring metrics for both the raw scores and RSS scores for projections along the AP axis only. Full comparisons for both AP and DV are shown in the main paper.

---

\*to whom correspondence should be addressed

| Annotation Term                                | Genes | Actual |       |       |       | RSS   |       |       |       |
|------------------------------------------------|-------|--------|-------|-------|-------|-------|-------|-------|-------|
|                                                |       | MSE    | Haar  | MI    | SMI   | MSE   | Haar  | MI    | SMI   |
| mnioserosa anlage in statu nascendi            | 19    | 0.000  | 0.000 | 0.000 | 0.000 | 0.000 | 0.000 | 0.000 | 0.000 |
| anlage in statu nascendi                       | 30    | 0.186  | 0.162 | 0.054 | 0.017 | 0.067 | 0.040 | 0.035 | 0.023 |
| anterior endoderm anlage in statu nascendi     | 30    | 0.012  | 0.012 | 0.003 | 0.002 | 0.002 | 0.001 | 0.002 | 0.001 |
| cellular blastoderm                            | 27    | 0.140  | 0.105 | 0.355 | 0.267 | 0.088 | 0.105 | 0.429 | 0.338 |
| clypeolabrum anlage in statu nascendi          | 10    | 0.011  | 0.007 | 0.010 | 0.005 | 0.040 | 0.041 | 0.004 | 0.007 |
| dorsal ectoderm anlage                         | 15    | 0.047  | 0.009 | 0.005 | 0.005 | 0.002 | 0.007 | 0.006 | 0.007 |
| dorsal ectoderm anlage in statu nascendi       | 72    | 0.000  | 0.000 | 0.000 | 0.000 | 0.000 | 0.000 | 0.000 | 0.000 |
| ectoderm anlage in statu nascendi              | 13    | 0.054  | 0.107 | 0.031 | 0.021 | 0.019 | 0.006 | 0.019 | 0.009 |
| endoderm anlage in statu nascendi              | 9     | 0.377  | 0.246 | 0.036 | 0.034 | 0.046 | 0.129 | 0.019 | 0.030 |
| foregut anlage in statu nascendi               | 25    | 0.003  | 0.002 | 0.003 | 0.000 | 0.000 | 0.000 | 0.001 | 0.000 |
| gap                                            | 27    | 0.074  | 0.030 | 0.035 | 0.022 | 0.015 | 0.015 | 0.034 | 0.026 |
| head epidermis anlage in statu nascendi        | 4     | 0.015  | 0.022 | 0.007 | 0.005 | 0.047 | 0.038 | 0.003 | 0.004 |
| head epidermis dorsal anlage in statu nascendi | 10    | 0.007  | 0.004 | 0.002 | 0.002 | 0.017 | 0.011 | 0.002 | 0.001 |
| head mesoderm anlage                           | 5     | 0.409  | 0.393 | 0.298 | 0.178 | 0.266 | 0.409 | 0.181 | 0.204 |
| head mesoderm anlage in statu nascendi         | 15    | 0.258  | 0.298 | 0.347 | 0.448 | 0.288 | 0.317 | 0.310 | 0.356 |
| hindgut anlage in statu nascendi               | 20    | 0.000  | 0.001 | 0.001 | 0.000 | 0.000 | 0.000 | 0.000 | 0.000 |
| mesectoderm anlage in statu nascendi           | 12    | 0.027  | 0.028 | 0.074 | 0.076 | 0.013 | 0.016 | 0.037 | 0.020 |
| mesoderm anlage in statu nascendi              | 18    | 0.334  | 0.496 | 0.331 | 0.205 | 0.128 | 0.292 | 0.221 | 0.195 |
| pair rule                                      | 5     | 0.520  | 0.322 | 0.064 | 0.041 | 0.041 | 0.044 | 0.030 | 0.047 |
| pole cell                                      | 13    | 0.829  | 0.733 | 0.932 | 0.956 | 0.967 | 0.870 | 0.946 | 0.968 |
| posterior endoderm anlage in statu nascendi    | 38    | 0.000  | 0.000 | 0.001 | 0.000 | 0.000 | 0.000 | 0.000 | 0.000 |
| procephalic ectoderm anlage in statu nascendi  | 67    | 0.000  | 0.000 | 0.000 | 0.000 | 0.000 | 0.000 | 0.000 | 0.000 |
| segmentally repeated                           | 9     | 0.001  | 0.001 | 0.002 | 0.001 | 0.000 | 0.000 | 0.002 | 0.001 |
| trunk mesoderm anlage                          | 5     | 0.216  | 0.279 | 0.072 | 0.047 | 0.022 | 0.053 | 0.066 | 0.046 |
| trunk mesoderm anlage in statu nascendi        | 17    | 0.240  | 0.217 | 0.479 | 0.455 | 0.080 | 0.143 | 0.345 | 0.411 |
| ventral ectoderm anlage                        | 11    | 0.119  | 0.092 | 0.025 | 0.022 | 0.002 | 0.001 | 0.006 | 0.002 |
| ventral ectoderm anlage in statu nascendi      | 69    | 0.000  | 0.000 | 0.000 | 0.000 | 0.000 | 0.000 | 0.000 | 0.000 |
| visual anlage in statu nascendi                | 17    | 0.000  | 0.003 | 0.005 | 0.004 | 0.000 | 0.000 | 0.001 | 0.000 |
| yolk nuclei                                    | 35    | 0.529  | 0.566 | 0.750 | 0.750 | 0.698 | 0.683 | 0.827 | 0.802 |

**Table 1.** Table showing the enrichment terms of only the AP projections for all genes within the second time grouping (time stages 4-6) for all four similarity values: Mean Squared Error (MSE), Haar wavelets (Haar), Mutual Information (MI), and Spatial Mutual Information (SMI) for the Actual scores, and RSS scores. Each row represents an individual annotation term, light gray shading represents 0.05 significance, while dark gray represents 0.01 significance values.
